# Supplementary material for: Metabolic Adaptation, a Specialized Leaf Organ Structure and Vascular Responses to Diurnal N2 Fixation by Nostoc azollae Sustain the Astonishing Productivity of Azolla Ferns without Nitrogen Fertilizer
Source: PubMed Central journal article supplement (PMC5374210; doi:10.3389/fpls.2017.00442), 2017-03-31
Supplement: Data_Sheet_1.pdf [file Data_Sheet_1.pdf]

## *Supplementary Material*

# **Metabolic adaptation, a specialized leaf organ structure and vascular responses to diurnal N<sub>2</sub> fixation by *Nostoc azollae* sustain the astonishing productivity of *Azolla* ferns without nitrogen fertilizer**

**Paul Brouwer, Andrea Bräutigam, Valerie A. Buijs, Anne O. E. Tazelaar, Adrie van der Werf, Urte Schlüter, Gert-Jan Reichart, Anthony Bolger, Björn Usadel, Andreas P. M. Weber and Henriette Schlupepmann\***

\*Correspondence: Henriette Schlupepmann, [h.schlupmann@uu.nl](mailto:h.schlupmann@uu.nl)

### **1 Supplementary Data**

#### **Supplementary Data files**

- The Supplementary\_Data\_File.pdf:

| <b>Supplementary Tables/Figures</b>                                                                                                                  | <b>Page</b> |
|------------------------------------------------------------------------------------------------------------------------------------------------------|-------------|
| <b>Supplementary Figure 1.</b> Leaf-lobe arrangement in <i>A. filiculoides</i>                                                                       | 2           |
| <b>Supplementary Figure 2.</b> Features of the <i>A. filiculoides</i> leaves                                                                         | 3           |
| <b>Supplementary Figure 3.</b> Cyanobacterial DNA in <i>A. filiculoides</i> without and with cyanobacteria                                           | 4           |
| <b>Supplementary Figure 4.</b> Transcriptional investments in functional categories comparing <i>A. filiculoides</i> and <i>Arabidopsis thaliana</i> | 5           |
| <b>Supplementary Figure 5.</b> Diel transcript abundance of major N-trafficking enzymes in <i>A. filiculoides</i>                                    | 6           |
| <b>Supplementary Figure 6.</b> The two loci encoding <i>AmtB</i> in the <i>N. azollae</i> genome                                                     | 7           |
| <b>Supplementary Table 1.</b> Primers for Q-RT-PCR                                                                                                   | 8           |
| <b>Supplementary Table 3.</b> Pathways enriched in diel transcripts                                                                                  | 9           |
| <b>Supplementary list of AMT protein sequences</b> (used in Figure 6)                                                                                | 10-12       |

- Two excell Files:

**Supplementary Table 2.** RNA seq of diel N-responses in *Azolla filiculoides*.

(including the following sheets: “alldata”; “summary”; “mapping\_stats”; “clock genes”; “diel transcripts”; “clusters”; “cluster\_10”; “N responsive”.)

**Supplementary Table 4.** Functional categories enriched when comparing *A. filiculoides* grown without and with 2 mM NH<sub>4</sub>NO<sub>3</sub> at the 4 time points during the diel cycle.

## 2 Supplementary Figures and Tables

### 2.1 Supplementary Figures

**Supplementary Figure 1.** Leaf-lobe arrangement in *Azolla filiculoides*. Leaves are arranged into two rows. Each leaf is made of the lower (LL) and upper lobe (UL). The lower lobes resting on the water surface may hold the upper lobes in their aerial position with the dorsal ab-axial surface of the upper lobe facing light. The ventral ad-axial surface of the upper lobe bears the leaf pocket pore (P).

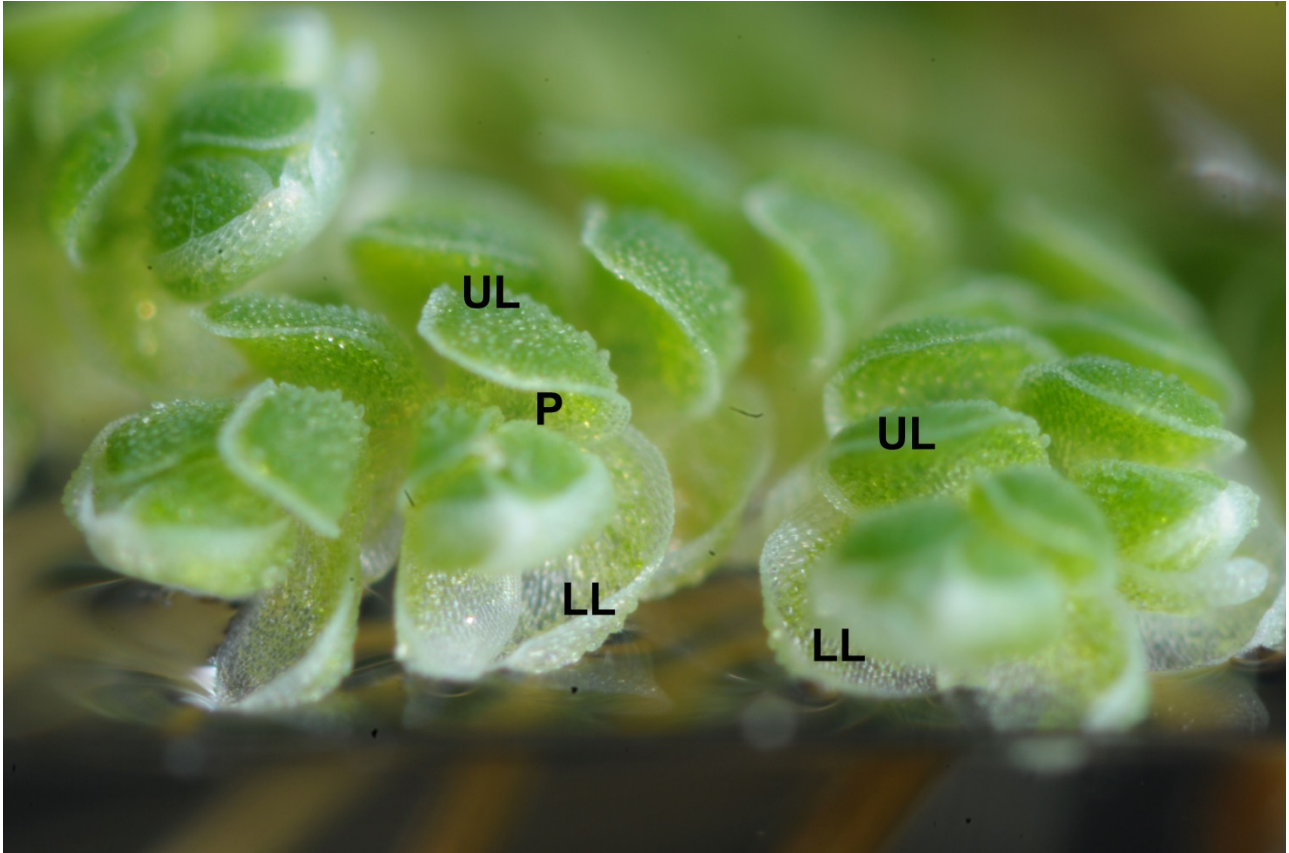

**Supplementary Figure 2.** Cyanobacterial DNA in *A. filiculoides* without and with cyanobacteria. DNA was extracted from clones of plant 12 without and with cyanobacteria. Subsequently, quantitative PCR was carried out to detect gene abundance from the fern (*TUBULIN* (*AfTUB*), *LEAFY* (*AfLFY*), *AfADENINE PHOSPHORIBOSYLTRANSFERASE* (*AfAPT*) and *FLOWERING LOCUS T* (*AfFT*)) and from the cyanobacteria (nitrogenase (*NaNG*); filamenting temperature-sensitive Z (*NaFtsZ*) and dihydrofolate reductase (*NafolA*). Shown are the average abundances relative to the average abundance of *LFY* from three replicate DNA extractions. Primer sequences for the amplifications are given in supplemental Table S1.

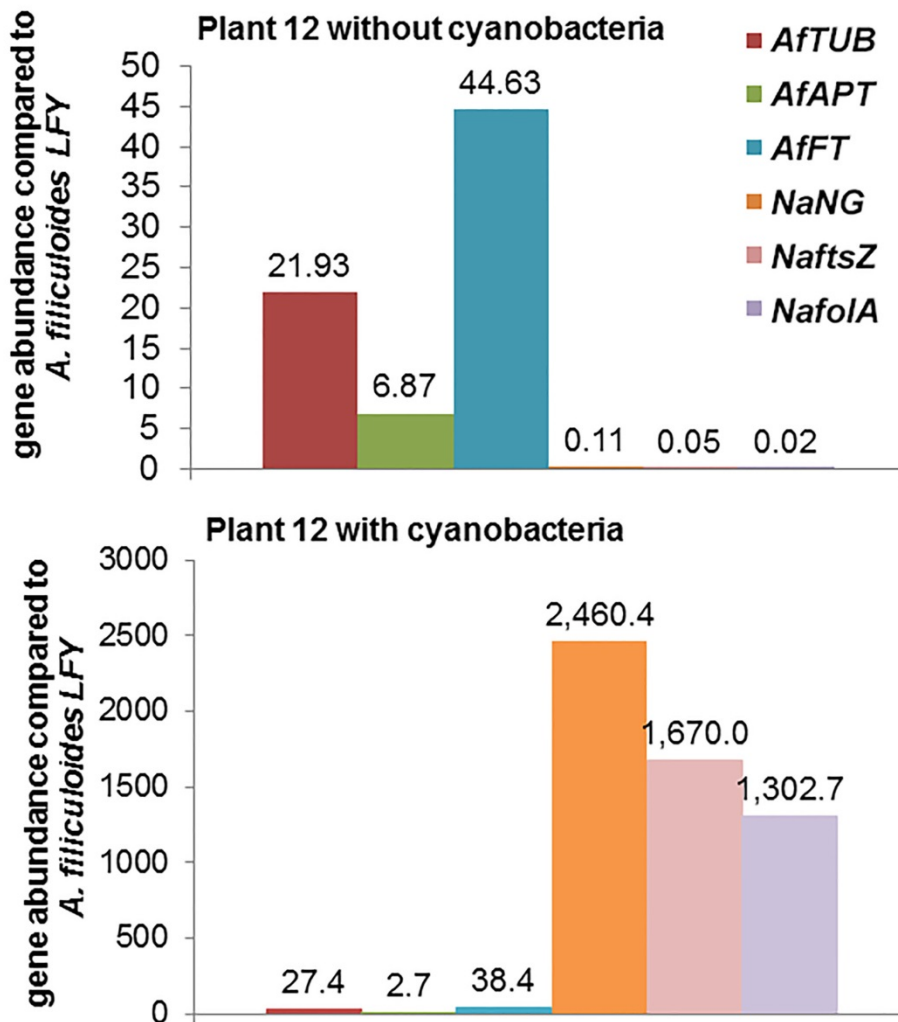

**Supplementary Figure 3.** Features of the *A. filiculoides* leaves. **(A)**, a single vasculature (v) branches away from the stem, then branches again to each one of the two leaf lobes: the lower leaf lobe without and the upper with leaf pocket. Only the leaf lobe with pocket has a prominent vasculature that curves around the leaf pocket (lp) with its pore (p); r, root; scale bar 200  $\mu\text{m}$ . **(B)** and **(C)**, details of the interface between the leaf pocket and vasculature at the beginning and at the top curvature of the vasculature surrounding the leaf pocket respectively. lh, leaf hair; x, xylem; ph, phloem; t, tracheid cell.

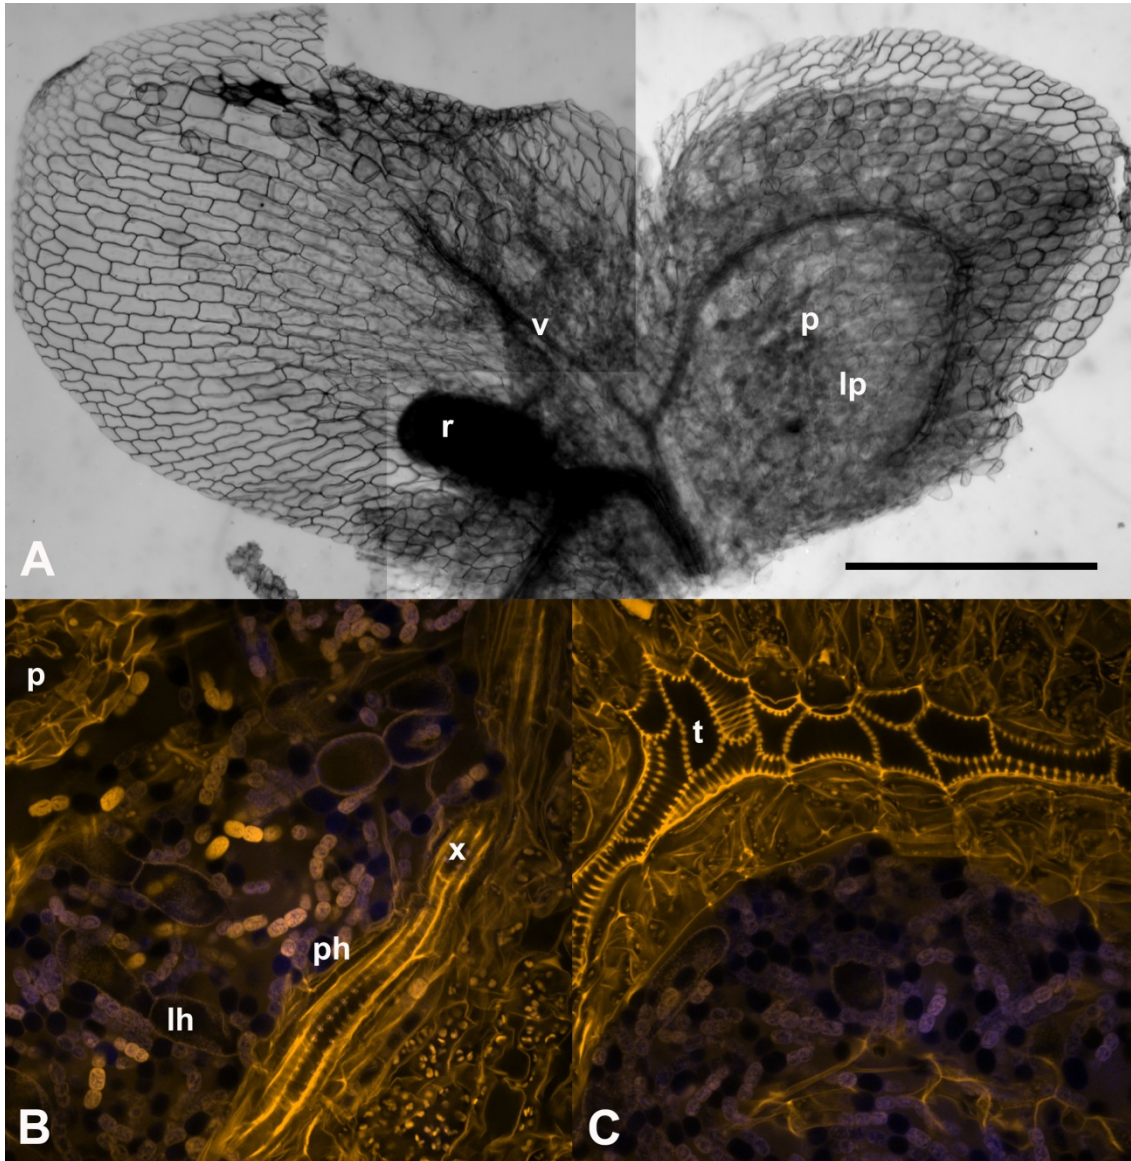

**Supplementary Figure 4.** Transcriptional investments in functional categories comparing *A. filiculoides* and *Arabidopsis thaliana* seedlings. Investment averages for *A. filiculoides* were for the 3 replicates at each of the time points 2, 8, 14 and 20 h either without or with N-fertilizer. Data of *Arabidopsis* seedlings was from (Scheible *et al.*, 2004)

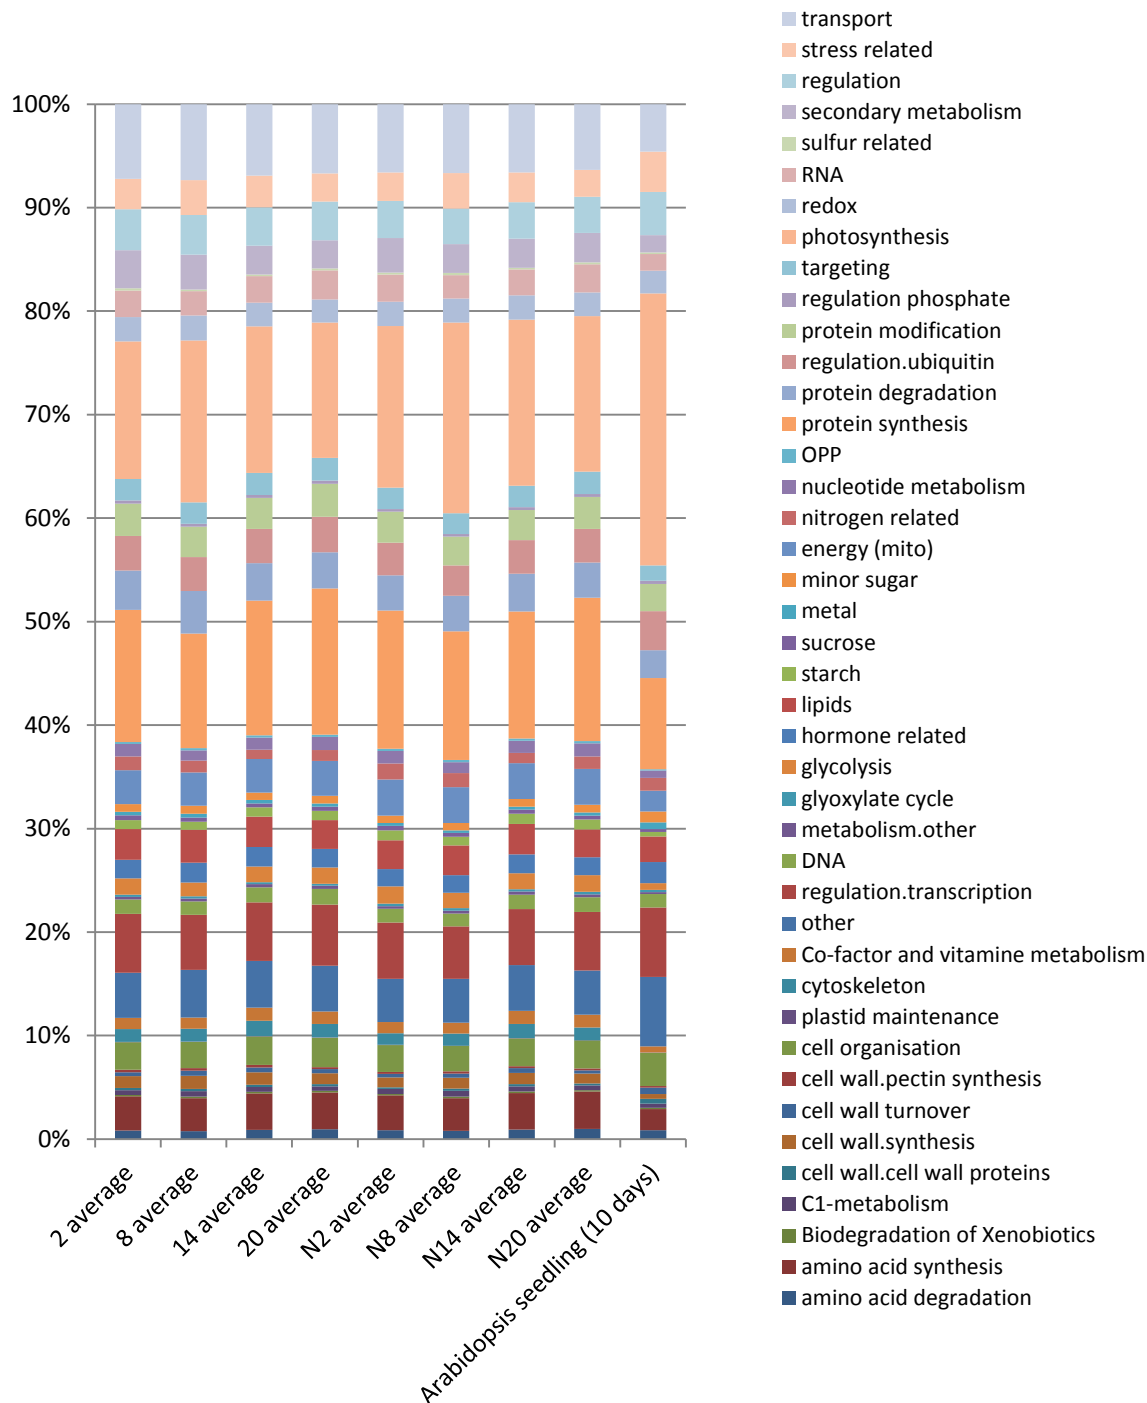



**Supplementary Figure 5.** Diel transcript accumulation of major N-trafficking enzymes in *A. filiculoides*. Read counts are given as rpm for 2, 8, 14 and 20 h in each box; the numbers are averages from 3 biological replicates for the contig with most reads of ferns on medium without N. AAT, aspartate aminotransferase; ALAT, alanine aminotransferase; AS, asparagine synthase; CPSA, Carbamoyl phosphate synthetase; GAD, glutamic acid decarboxylase; GDH, glutamate dehydrogenase; GFPAT, glucosamine-phosphate n-acetyl transferase; GGAT, glutamate:glyoxylate aminotransferase; GOGAT, glutamate synthase; GPAT, glutamine phosphoribosylpyrophosphate amidotransferase; GS, glutamine synthase; P5CR, pyrroline-5-carboxylate reductase; P5CS, pyrroline-5-carboxylate synthetase. \*marks the only transcripts with significantly changed steady states when ferns are grown with N compared to no N.

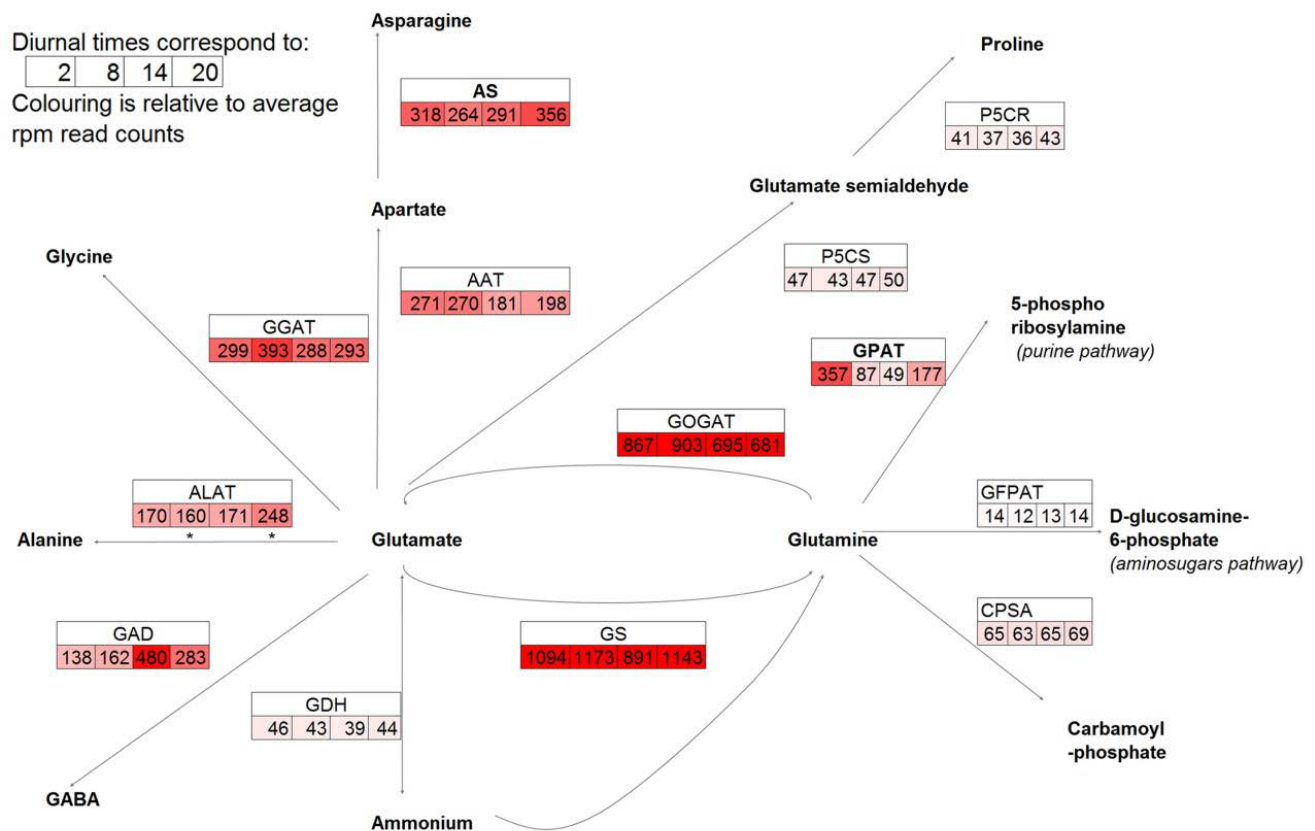

**Supplementary Figure 6.** The two loci encoding AmtB sequences in the *N. azollae* genome. Annotation of the *N. azollae* genome was visualized with SEED VIEWER (Overbeek *et al.* 2005 Nucleic Acids Res. 7;33(17):5691-702 DOI: 10.1093/nar/gki866). **(A)**, the locus of *N. azollae* similar to the AmtB locus in the closely related *Anabaena variabilis* ATCC 29413 strain contains truncated AmtB fragments flanked by mobile elements (15) ; 1, AmtB; 5, phosphoribosylaminoimidazole carboxylase (EC 4.1.1.21); 9, N-acetylglucosamine-6-phosphate deacetylase (EC 3.1.5.25). **(B)**, a locus entirely distinct from that of the AmtB loci of closely related bacteria contains the functional AmtB of *N. azollae*.

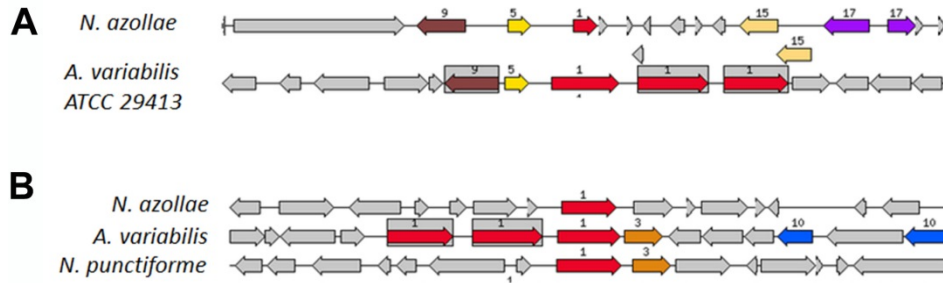

## 2.2 Supplementary Tables

**Supplementary Table 1** Primers used for quantitative Reverse Transcription-PCR on RNA and for quantitative PCR on genomic DNA preparations.

| Name       | Azolla contig number | Forward primer          | Reverse primer          |
|------------|----------------------|-------------------------|-------------------------|
| Af_TUB-1   | 22933                | CCTCCGAAACTCTCCTTCC     | GGGGGTGATCTAGCCAAAGT    |
| Af_ACT7-5  | 3487                 | TGGGAGAACCACAGGTATTG    | TCACGTCCAGCAAGATCAAG    |
| Af_CAS-1   | 8998                 | TGGTGGATTCTCAGCAACAG    | TCAGCAAACACAGATGACTGC   |
| Af_ATPd-1  | 1569                 | AATGGTGGTAATGGCTCTCG    | AGGCTTGGTGGTGGATATTG    |
| Af_NR-4    | 36782                | GAAGATCAACCCCTGCAAAG    | ATCATCCATCCTCCTCCTTG    |
| Af_APT-1   |                      | TAGAGATGCATGTGGGTGCAGT  | AAAAGCGGTTTACCACCCAGTT  |
| Af_FT-1    |                      | AAGAGATTTGGCAAGCTGGA    | TAGCAACCACCAACAGCATC    |
| Af_SOC1-1  |                      | ATGGGATCGTAAGGCTTCAAAA  | AGCAGAGCACACAGGTCTCAAC  |
| Af_LFY-1   |                      | GCGGCAAGAGGAAGAGATAGA   | AGTGGATGTGCTCTTGCTGAA   |
| Af_CAL_1   |                      | TTTGCATCTTTCGCTCTCTCA   | CCAAGCTGCACAATGTAAGGA   |
| Na_NifH-1* |                      | TTCACTCCAAGGCTCAAACC    | CGGAAACCGGTCAACATTAC    |
| Na_SecA-1* |                      | AGTATATGGCGCGGTTGAAG    | AACAAAGCCTTGAGCACCAC    |
| Na_folA-1* |                      | ATCCTGTGATTCTCGGTCGTAAA | TGCTTCTGCAAAAATTTCTCCTC |
| Na_FtsZ-1* |                      | TTCGCTATGCTGATGATGTCCTA | GCTCCTCAATCGAGCATTCTAA  |

\*From the *Nostoc* strain 0780 genome.



**Supplementary Table 3. Pathways enriched in diel transcripts determined by Wilcoxon-Rank-Test.**

| <b>Name</b>                                                           | <b>Elements</b> | <b>q-value*</b> |
|-----------------------------------------------------------------------|-----------------|-----------------|
| cell wall.modification                                                | 24              | 5.99E-13        |
| cell wall.pectin esterases                                            | 46              | 4.98E-08        |
| major CHO metabolism.degradation.starch                               | 53              | 3.83E-06        |
| secondary metabolism.phenylpropanoids                                 | 74              | 4.47E-06        |
| amino acid metabolism.synthesis.serine-glycine-cysteine group.glycine | 8               | 7.88E-06        |
| secondary metabolism.wax                                              | 36              | 1.11E-05        |
| PS.lightreaction                                                      | 115             | 1.73E-05        |
| major CHO metabolism.synthesis.starch                                 | 45              | 2.48E-05        |
| minor CHO metabolism.trehalose.TPS                                    | 12              | 7.69E-05        |
| amino acid metabolism.synthesis.central amino acid metabolism.alanine | 12              | 7.69E-05        |
| lipid metabolism.Phospholipid synthesis                               | 66              | 1.25E-04        |
| N-metabolism.nitrate metabolism                                       | 3               | 1.56E-04        |
| minor CHO metabolism.trehalose.TPP                                    | 5               | 1.62E-04        |
| PS.calvin cycle                                                       | 72              | 1.67E-04        |
| lipid metabolism.lipid degradation.lysophospholipases                 | 64              | 2.39E-04        |
| S-assimilation                                                        | 11              | 6.71E-04        |
| minor CHO metabolism.raffinose family                                 | 9               | 0.00218605      |
| PS.photorespiration                                                   | 31              | 0.0027783       |
| amino acid metabolism.synthesis.aspartate family.threonine            | 4               | 0.00281646      |
| secondary metabolism.flavonoids                                       | 54              | 0.00292455      |
| secondary metabolism.isoprenoids                                      | 112             | 0.00462668      |
| lipid metabolism.glycolipid synthesis                                 | 10              | 0.00517521      |
| major CHO metabolism.synthesis.sucrose                                | 17              | 0.00545819      |
| tetrapyrrole synthesis                                                | 57              | 0.00679658      |
| C1-metabolism                                                         | 48              | 0.0082183       |
| N-metabolism.ammonia metabolism                                       | 26              | 0.00980327      |

\* q-value was corrected for multiple hypothesis testing by Benjamini Hochberg; only significantly enriched pathways are shown.

### 3 Supplementary list of AMT Protein sequences

>*Azolla\_filiculoides\_9791\_AMT2*

MATSVDPDWLDKGDNAWQLVAATVGMQSMPLVILYGSIVKKKWAVNSAFMALY AFAATLLCWVWTWAYKMSFGEKLLPIWGKAGPALGI  
DYLIGNAHIPASVHLDSSGAVETAETAEIAPAFPMATLVYFQFVFAAITVIVAGSLLGRMNFKAWMLFVPLWLTFSYTVSAFSLWGGGFLFQWGV  
GPRLKKDKDNFPPNNILMTLAGAGLLWLGWSGFNGGSALAAVNSASIAILNTHVCTATSLLVWISLDIIFLGKPSVIGAVQGMTTGLVCITPAA  
GLVQGWAAIIMGVLSGSPWFTMMVLHKKLHILQHVDLTLGVLHTHAVAGILGGILTGLFAHPTLCSFFAPVKGARGSIYGGQGRDQVGRQL  
AGALFVVAVWNVVTSIICLGKIMVPLRMSNNELMGDDAAHGEEAYALWGADDKPGQVFTSVEYDNNASVHNNAAQYIASTATIQI

>*Azolla\_filiculoides\_10854\_AMT2*

MSGGVPSAYNNTGGVLPDWLNKGDNAWQMTAATLVGLQSMPLVILYGSIVKKKWAVNSAFMALY AFAAVLICWVVIWAYKMAFGEKLLP  
FWGKAGPALGQHYLVSOAALPETAHYHKDGTLETAEITPFYPMATMVYFQAEFAAITVILIAGSLLGRMNIAWMIFVPLWLTFSYTVGAFSL  
WGGGFLFQWGVVIDYSGGYVIHVSAAGTAVFAAYVWGPRLTKDRERFPPNNVLLTLAGAGLLWLGWAGFNGGDPYSANIDSSIAVLNTHV  
AAASLLVWTSLDVIFFKPSVIGAVQGMITGLVCITPAAGVVEGWAAIIMGILAGSVPWFTMMVHKKSKILQKVDLTLGVFHTHAVAGTLG  
GLLVGLFAEPTLSSYFLPVQNSRGGFYGGKAGGEQFGKQLVGFALFIIGWNVVSTIILLIKMIVPLRMTDDELLIGDDAAHGEEAYALWGDG  
EKFDLTDQSHSHDHLPTTFSPPYGRGTVEL

>*Azolla\_filiculoides\_9806\_AMT2*

MALPMA Y ANNTSSVPDWLNKADNAWQLTAATLVGLQSVPLVILYGSIVKKKWAVNSAFMALY AFAATLLCWVWTWAYKMAFGDRLLPM  
WGKAGPALSQDYLVRAYLPATEIRGHISEGVGESNTPHHPFFPMAAMVYYQFAFAALTIIILAGSLLGRMNIAWMIFVPLWLTFSYTVGAF  
SLWGGGFLFQWGVLDYSGGYVIHVSSGVAGLVAAFVWGPRLTKDRERFPPNNILLTLVAGALLWLGWAGFNGGSGFSADIDSSIAVLNTHV  
CTATSLLVWAALDVLIFGKPSVIGAVQGMITGLVCITPAAGLVQGWAAIIMGMLLAGSVPWFTMMVHKKSRILQHVDLTLAVFHTHAVAGI  
LGGLMTGLLADPILCSYFRPGVKSGGSFYGGQKQDQIGRQLVGFALFIIGWNVVTSIICLAIKLVVPLRMSVEELSTGDDAAHGEEAYALWGD  
GEKFNDNRFNVTSSNIPMSNLQDAEHGIIATHYNLPKESLTTSTSVHI

>*Azolla\_filiculoides\_11414\_AMT2*

MALPMA Y ANNTSSVPDWLNKADNAWQLTAATLVGLQSVPLVILYGSIVKKKWAVNSAFMALY AFAATLLCWVWTWAYKMAFGDRLLPM  
WGKAGPALSQDYLVRAYLPATEIRGHISEGVGESNTPHHPFFPMAAMVYYQFAFAALTIIILAGSLLGRMNIAWMIFVPLWLTFSYTVGAF  
SLWGGGFLFQWGVLDYSGGYVIHVSSGVAGLVAAFVWGPRLTKDRERFPPNNILLTLVAGALLWLGWAGFNGGSGFSADIDSSIAVLNTHV  
CTATSLLVWAALDVLIFGKPSVIGAVQGMITGLVCITPAAGLVQGWAAIIMGMLLAGSVPWFTMMVHKKSRILQHVDLTLAVFHTHAVAGI  
LGGLMTGLLADPILCSYFRPGVKSGGSFYGGQKQDQIGRQLVGFALFIIGWNVVTSIICLAIKLVVPLRMSVEELSTGDDAAHGEEAYALWGD  
GEKFNDNRFNVTSSNIPMSNLQDAEHGIIATHYNLPKESLTTSTSVHI

>*Azolla\_filiculoides\_9791\_AMT1*

MATAWNTSCLASSTIDPSVCAQFDV VNAHLIATTLAINNTYLLFSAYLVFAMQLGFAMLCAGSVRAKNTMNIMLTNVLDAASGGLSYLFLG  
FAFAFGRKSDGHNNGFGRHFFGLKQIPDELNGFDYSFFLYQWAFAlAAAGITSGSIAERTQFAYLVYSCFLTGFVYPPVSHWLSVSDGWLS  
ATNPSLLFGSGAIDFAGSGV VHMVGGIAGLWGAFIGEPRMGRFDADGQPRLKGHSA TLVVLGSLFLLWFGWYGFNPGSFLVILASPYDTFKG  
NWSGVGR TAVTTTIA GSTAALTTLFGKRALGGHWNVL DVCNGLLGGFAAITAGCSV VDPWASIVCGFVSAWVLIGLNLAEKLFDDPLEA  
AQLHGCGGAWGLLFTVGLFAENYVNVQYVGR TGDNVYGLFMGGGGRLLAGA QIVEILSIIGWV TATMAPLFFILHKLNLRLRISPKDEFVGM DPT  
RHGGHAYYHHDDEPGLSPYKNMTQLKELKTGAPPEVLV G

>*Arabidopsis\_thaliana\_AMT1;2*

MDTATTTCSAVDLSALLSSSSNSTSSLAATFLCSQISNISNKLSDTTYAVDNTYLLFSAYLVFAMQLGFAMLCAGSVRAKNTMNIMLTNVLD  
AAAGAISYLLFGFAFAFGTSPNGFGRHHSFFALSSYPERPGSDFSFLLYQWAFAlAAAGITSGSIAERTQFVAYLYISTFLTGFVYPTVSHWFWS  
SDGWASASRSDNNLLFGSGAIDFAGSGV VHMVGGIAGLGCALVEGPRIGRFRDRSGRSVALRGHSASLVVLGTFLWFGWYGFNPGSFLTILK  
GYDKSRPYGQWSAVGR TAVTTT LSGCTAALTTLFSKRLLAGHWNVIDVCNGLLGGFAAITSGCAVVEPWAAIVCGFVSAWVLIGFNLLAK  
KLKYDDPLEAAQLHGCGGAWGLIFTGLFARKEYVNEIYSGDRPYGLFMGGGGKLLAAQIVQIIVIGWVTVTMGPLFYGLHKMNLRLISAED  
EMAGMDMTRHGGFA YANDEDDVSTKPWGHFAGRVEPTSRSTPTPTLT V

>*Arabidopsis\_thaliana\_AMT2*

MAGAYDPSLPEPEWLNKGDNAWQLTAATLVGLQSMPLVILYASIVKKKWAVNSAFMALY AFAAVLICWVLLCYKMAFGEELLPFWGK  
GGPAFDQGYLKGQAKIPNSNAAPYFPMATLVYFQFTFAAITTLVAGSVLGRMNIAWMIFVPLWLTFSYTVGAYSIWGGGFLYQWGVVIDY  
SGGYVIHLSGGVAGVFAAYVWGPRLKDRERFPPNNILLTLVAGLLWGMWGFNGGAPY AANLTSSIAVLNTHVAAASLLVWTTLDVIF  
FGKPSVIGAIQGMV TGLAGVTPGAGLIQTWAAIIGVVSQTAPWASMMIHKKSALLQKVDLTLAVFYTHAVAGLGGIMTGLFAHPDLCLV  
LPLPATRGAFYGGNGGKQLLQLAGAFAVWNVVSTIILLAIRVFIPLRMAEEELGIGDDAAHGEEAYALWGDGEKFDATRHVQQFERDQ  
EAAHPSYVHGARGVTIVL

>*Physcomitrella\_patens\_AMT1;1*

MERIQGFLGAVSNATGLSIFLCKDLNIDGRLGYTKLAVDNTYLLFSAYLVFAMQLGFAMLCAGSVRAKNTMNIMLTNVLDAACGGISYVYV  
GFAFAGLGGKTNFGIFHNWGLNGFPNGTFDYSFFLQWAFAlAAAGITSGSIAERTQFVAYLVYSSFLTGFVYPIVSHWLSADGWLSASK  
TVGPGGLLFGSGAIDFAGSGV VHMVGGVAGFWGALIEGPRIGRFDKSGNSTNFRGHSATLVVLGTFLWFGWYGFNPGSFLTILQPYEGVKG  
HWSGVGR TAVTTTLAGCTAAVTTLFGKRFLDGHWNVL DVCNGLLGGFAAITASCSV VAPWASILCGFVSAWVLIGLNLKLAARLHFDDPLEA  
AQLHGCGGAWGLLFTVGLFAENYVNVQYVQTTDFDPSYGLFMGGGGKLLAAQIEIISIAAWVTVTMGPLFYGLHKFRLLRITPQDEIAGMDVT  
RHGGTAYIHHDNSEHHLQMHTINGQKRTDNDQMPI

>*Pinus\_pinaster\_AMT1;1*

MSNFYDYSCTAPELAMLQSLNLTAGDFFCNKLAQVSDRLSATSRAVDSTYLLFSAYLVFAMQLGFAMLCAGSVRAKNTMNIMLTNVLDA  
GGIFYLFGFAFGKHSNGFHYFFGLTEVPNQEQYDYAYFLYQWAFAlAAAGITSGSIAERTQFVAYLYSSILTGFVYPPVSHWVWS  
PDGWMSASNASGLLFGSGVYDFAGSGV VHMVGGIAGFWGALIEGPRIGRYDKEGKPNIGRHSATLVVLGFPSSLWFGWYGFNPGSFAKILVP  
YGAGGSYVDGQWTAIGRTAVTTTLAGCSAALTTLFGRRLLTGHWNVL DVCNGLLGGFAAITGGCSIVDPWAAIILCGFVSAWVLIGFNILAG  
KMKYDDPLEAAQLHGCGGAWGIIIFALFAKEEYILQAYGLLNGKSSRPSGLFMGGDGRLLAAHVQIIVTTGWV TATMAPVYVLRHFKLL  
RVSAADEMAGMDVTRHGGGAYVYHSDDDDKHIHPGGFMMKASRNMTFPHNNNYRNGAEDNDDDTL

>*Selaginella\_moellendorffii\_AMT1;1*

MALAAVASIRCSSQDLLSFGLAANASSALCSKLDVADRLYATQLAVDNSYLLFSAYLVFAMQLGFAMLCAGSVRAKNTMNIMLTNVLDA  
CGGISYLLFGFAFAFGTGGTNGFGRYFFALSEIPDSSAGFDYSFFLQWAFAlAAAGITSGSIAERTQFVAYLYSTFLSGFVYPIVSHWVWS  
DGWASASKPSGRLLFGSGAIDFAGSGV VHLVGGLAGFWAAQIEGPRIGRFDKGGAA TLVVKGHASLVVLGTFLWFGWYGFNPGSFVTLSP

YGAGSFTGNWTGVRGRTAVTTTTLAGCSAAITTLFGRRLTGHWAUVVDCNGLLGGFAAITAGCSVVDPWASLICGFVSAWVVLIGNLLAERFH  
YDDPLEAAQLHGCGGTWGLIFTLFAKKEHVNLVYGRSTPYGLFLGGGRLLAAQIVYLAIVGWVVTVMGPLFWMLHRLNLLRISPEDEV  
AGMDLTRHGGMAYYHQDGSHTDGHKFLQHNLSKHGGGNAPGMVHDAASPL

>*Selaginella\_moellendorffii*\_AMT2;1

MKCSYLSSTPCWMDKGSNAWMMVAAAILAGLATMPGLLLYSGIARKKWAVNTAFLTYAFTASLICVVTICHNLAFGSHLLPFWGTGPGP  
VLYTKFLLSRSQHPATHQDLDFPSATMVAFQFGFAANSVAIVSSAVSARITFQAWAVFVPLWLIFS YTVGASSIWSGGFFSRWGLDFAGGYV  
VHLSAGVSGAVLAWHWVGRHPVDRARYPPNNVMLVLAGAGLVWLGWIGFAGGS AFLSPQQASLAVVNTNIAAATSLLVWTSLDVIFYHGQP  
SVLGAVQGLMTGLVAISPAAGLVEGWASMCIGLCSGSLPWLTRLCHQKTTAKFCEEVDDTAGAVHHTGIAALIGVLLTGFFAHPRLTAMVSP  
VSGSEGVIFGNFQLV LKQLAAALLVILWNVAVTTLICV VVKRLMKLRMSDDQLRIGDDAVHGEEAYAVWEDGEKTTL

>*Physcomitrella\_patens*\_AMT2;7

MADALPTVPIAYNQTTGGVTPAWLNKGDNAWQLTASTLVGVQSVPALVILYGSIVKKKWAVNSAFMAFYAFAAVWLCVWGWAYKMSFGE  
KLIPIWGKAGTTLSYKYLLSQAELPSTAHYHKNNGDIETYALTPFFPMASLVYFQFVFAAITL VLLAGSVLGRMSFRAWMLFVPLWLTCSYTVG  
AFSLWGGGFLWQWGVIDYAGGFVIHLSGGIGGFVAA YVWGPRLTKDRERFPPNNVLLMLAGAGLLWMGWAGFNGGAALSANLIASIAVMN  
TNVCAATSLLVWTCLDVLFQKPSVIGAVQGMITGLVCITPAAGVVQGWAAIAMGVLSGIIPWFTMMVHLKRSTLLQK VDDTLGVFHTHAV  
AGLVGGLLVGCFEPTLGRKPTAVGAATGAVAGLVGITPAAGFVTPLAAILIGFITSFVCFYAVSFKHKLNVDDALDTPVHGVGGTIGAV  
ALWGDGEMFDMSKHGALTSNLSTLSSNDFGSEKSRPTITL

>*Pinus\_pinaster*\_AMT2;1

MATYLPATAYQNGTTPDWLNKGDNAWQMVAAATLVGMQSMPLVILYGSIVKKKWAVNSAFMAYAFSAVMICVWVTWAYKMAFGHKLPL  
LWKGAPLALGADLPASQHNHNGTLETAMIAPFFPMATMVFFQFSAAITL LLAGSVLGRMNKA WMAFVPLWLTFSYTVGAFS  
LWGGGFLQWGVIDYSGGYVIHVSSGISGFTAAYVWGPRLTKDRERFPPNNVLLMLAGAGLLWMGWSGFNGGDPYSANIDSSMAVLNTNIC  
AATSLLVWTCLDVIFFGKPSVIGAVQGMITGLVCITPAAGVVQGWAAIAMGVLSGIIPWFTMMVHLKRSTLLQK VDDTLGVFHTHAV  
GALTGLFAEPTLCSLFLPVNTSKGAFYRGPQGVQFLKQLAGACFIIGWNVVATSILLVISLVIPLRMTDEQLLIGDDAIHGEEAYALWGDGEKY  
DNTKHGWYDDTTAGDGRGQARGVTIEL

>*Nostoc\_azollae*\_AmtB

MLKKVLTIGVLTFLFTPLMGNALAQGRSTPPDPDTGDTAFMLISSALVLLMTPGLAFFYGGFVRSRNLNTLMMSFVLMIAIGVTWVLWGY  
SLSFAPGVPIFGGLEWLGLNGVLETTGYLEDSAPAEVVS YAGTIPHQAFMIYQAMFAITPALISGAIAERMSFRAYCLFVLLWSTFIYTPLAH  
MVWAKGGFLGLYGGALDFAGGTVVHISSGVSALVAAIVLGRPKSHDRLSPPHNVPFILLGAGLLWFGWFGFNAGSALSAGSIATAAFVA  
TNTAAAAGTLMWLILEATLRGKPTAVGAATGAVAGLVGITPAAGFVTPLAAILIGFITSFVCFYAVSFKHKLNVDDALDTPVHGVGGTIGAI  
LTSIFATTEVNSGGKDGVLGRNREFVELAAIAIAYIIAGTGTWILKIIDATIGLRVKEEAENQGLDIHEHGEEGYNSEFGDRINV

>*Nostoc\_sp\_PCC\_7120*\_AmtB

MAINTGKNKLMNRHIRPWQRLVLAIGSMVFAVFAPTIVQAVDPTPTLESSETTIKQLQSIDTTWVLLSGFLVFFMQTGFAMLEAGLVRQRSVV  
NTLLENFIDAAVTVLAWVAVGFGIAFGTSAGGLFGIDTFFLSQLPGADGSYPLGAPGSTAAINTYTLFFFQFAFAATASITTTGSMAGRTDFIGD  
LIYSAIMGAISYPIIHWAWNSNGWLKLSYHDFAGGSIVHTVGGWTALVGA YLLGPRPDRPPWGKLP AHNLAALATLGTMLWFGWYGFN  
PGSTLGTANPGLIGLV TINTTLAGAGALAAFLIFYVRTGKWDLVYCLNGSLAGLVAITAPCA YVAPWASVLIGLGGIAVVLVGSVLSLHID  
DPVGAFSVHGISGMMGTL SIGFLGQEELTNQKAGLLGGGFDLLGIQMLGIVAITVFTVAF AFLMYGGLKAMGHLRVNAEADRIGIDTYEHG  
ASVWPDVYSVEELSKPQEHTKISENKTLEGE

>*Anabaena\_sp\_PCC\_7120*\_Amt

MYQQKSRTRNRFRSTRNYAKSRQSNQIQIFNLVKKLSPSWQACIPLACLIVLWGSYVAVAQAPAAGPTTAEKVALD TLWVAIAAFLVFFM  
NAGFGMLETGFCRQKNAVNLAKNLIVFALATVAFWAIGFGLMFGDGNDFIGNGLFSGVDNSPATGDAYKGVFSALS WAGVPLAAKFLF  
QLVFAAGTAAIVSGAV AERIKFVDFLIFSLLLV G IAYPITGHWIWWAGWLAGAGWDFAGSTV VHSVGGWAALMGA AFLGRIGKYQDKQIV  
ALPQHNSIATLGLLILWLGWGFNPGSVMAADPNATHIALTTNMGAVGGIAATATAWL YLKGKPDLSMIINGILAGLVGITASCAYVSISS  
IIIGLIAGVIVVFSVTFDKLGDIDPVGATS VHLVCGVWGTLAVGLVSWGPGVYSWYGEGLGPTKGLFAGGGGLQ LITQFLGAAVGGMTVL  
VSSIFWVVKATLGRVTRREELEGLDIGEHGMEAYSGLFKEASPGGFAEGKTS DGY

>*Anabaena\_sp\_PCC\_7108*\_AmtB

MLKKFVMIGVLTGFLAFPLGSLAQQGTATPPAPDPTGDTAFMLISSALVMLMTPGLAFFYGGFVRSRNLNTLMMSFVLMIAIVGVTWVLWG  
YLSFAPGLPIFGGLQWLGLNGVLETTGYLEGSAPAEVVS YAGTIPHQAYMIYQAMFAITPALISGAIAERMSFRAYCLFVLLWSTFIYTPLA  
HMVWAKGGFLSGLYGGALDFAGGTVVHISSGVSALVAAIVLGRPKNHDRLSPPHNVPFILLGAGLLWFGWFGFNAGSALSAGSVATVAF  
VATNTSAAAGALMWLILEATLRGKPTAVGAATGAVAGLVGITPAAGFVTPLSAILIGLMTALVCFYAVSFKHKL NIDDALDTPVHGVGGTL  
GAILTAFFATTEVNSGGKEGVLGRNFGELFVELGAIAYI IAAVGTWILKFDISTIGLRVKEETENQGLDINEHGEEGYNSEFGDRINLS

>*Dolichospermum\_circinale*\_AmtB

MLKKV VITGCLTLLMLGGLLTGNAWA AESTAAPPDPTGDTTFMLISSALVLLMTPGLAFFYGGFVRSRNLNTLMMSFVLMIAIVGVTWVLW  
GYLSFAPGLPIFGGLQWLGLNGVLETTGYLQGSAPAEVVS YAPTIPHQAFMIYQAMFAITPALISGAIAERMSFRAYCLFVLLWSTFIYTPL  
AHMVWAKGGFLGLYGGIGALDFAGGTVVHISSVSA LVAIVLGRPKNYPDRLSPPHNVPFILLGAGLLWFGWFGFNAGSALSAGTVATVAF  
VATNTSAAAGSLMWLILEATLRGKPTAVGAATGAVAGLVGITPAAGFVTPLAAILIGFITSFVCFYAVSFKHKLQVDDALDTPVHGVGGTIG  
AILTAFFATTEVNSGGKDGVLGRNSELVELVAIALAYIIAGVGTWILKIIAATVGLRVPDQTEENQGLDIHEHGEEGYNSEFADRISNK

>*Raphidiopsis\_brookii*\_AmtB

MLRKFLVISGLIVLLTFPFAGNAVAQNTTPAPDPTGDTTFVLMSSALVLLMTPGLAFFYGGFVRSRNLNTLMMSFVLMIAIVGVTWVLWGY  
LSFAPGLPIFGGLQWLGLNGVLETTGYLKGSPQEVLSYASTIPHQAYMIYQAMFAITPALISGAIAERMSFRAYCVFVLMWSTFIYTPLAHA  
VWAKGGFLGLYGGIGALDFAGGTVVHISSGVSALVAAIVLGRPKNHDRLP PPHNVPFILLGAGLLWFGWFGFNAGSALSAGTIATVAFVAT  
NTSAAAGALMWLILEATLRGKPTAVGAATGAVAGLVGITPAAGFVTPLAAILIGFITSFVCFYAVSLKHKLNVDDALDTPVHGVGGTIGAVL  
TAIFATTEVNSGGKDGLLRGNFGELFVELGAIAYI IAAVGTWILKIFISATIGLRVQEEAEDQGLDVYEHGEEGYNSEFSDRINI

>*Fischerella\_muscicola*\_AmtB

MLKKVVMIGAIALLAGPLIGNALAAPVDVNAAISNAQTAADTAFMLISALVLLMTPGLAFFYGGFVRSRNLNTLMMSFVLMGVVGV  
WILWGYSLAFAPGNPIFGGLQWLGLNGVTELT DYLKGSNPPEILSYAPTIPHLAFMIYQAMFAITPALISGAIAERMSFTAYS L FVLLWSTFV  
YSPLAHMVWKGKGFGLAGGLGALDFAGGTVVHISSGVSALVAAIVLGRPKTYPDRLSPPHNVPFILLGAGLLWFGWFGFNAGSALSAGSLA  
TIAFVNTNTSAAAALTWLILEKVLGRKPTAVGAATGAVAGLVGITPAAGFVTPLAAILIGSITTFVCFYAVSFKHKIQIDDALDTPVHGVGG  
TVGAILTAVFATTAVNSAGKNGLLYGNPRELLVELAAIAIAYVAVGVTGVTFLKIDATVGLRVKEVAEMQGM DISEHGEEGYNEEFGDRISV  
SDK

>*Microcystis\_aeruginosa\_PCC\_9808*\_AmtB

MLLGLGFNFVAPVFAETVAAAPPNPISAGDTAWMLISSALVLLMTPGLAFFYGGFVRSRNLNTMMSLVAMGVIGVTWVLWGYSLAF  
DVTGKSGFGEIEAFIGLDWIFLNGV TAAAPDNIGYAPTVPHQVFMVYQMMFAITPALISGAIVERVNFKA YFWFLLWSTFIYSPLAHVW  
WGKWLAAATGALDFAGGTVVHSSGISALVAAVWIGPRRSFGTQTYAPHNVPFVLLGIGLLWFGWFGFNAGSALS SSSSLATTAFVNTTIAAS

AGGLTWMFIEWILRGKPTAIGIASGFLGGLVGTTPAAGYVLPVIGAILIGSITALSCFFAVSLRAKLRFDSDLDTPVHVGGTIGAILTGVFATKS  
VNSFGNDGLLFGNPLVWTFVGVAAATYIFAAVGTFFVILKVLSDLRVPKNTAEGLDVPQHGEAYGQEFEGSSFSYQENPPSTNPREN  
Y

>*Desulfotomaculum\_acetoxidans\_Amt*

MLKNLWRLVLTSLMLLPLGLAWAEDA VPPAINAGDTAFVLSAALVLLMTPGLALFYGGMVREKNVLSVIMQSFIVIGLVSQVWVLFVGS  
AAFPGDIKHIIGSMDWAGLANVGDNDYAGTVPHLAFMSFQLMFAITAAALITGSFAERMRFPAFLIFLWTSVYDPLAHVWVWVGDGK  
LRNLGALDFAGGTVVHSSGVSGLVAAIVLGRRKGYGTEPMIPHLLPMTVLGASLLWFGWFGFNAGSAVSVANGLACSAFVVTNTAAAAAAL  
SWVAVEWMRHGKPTVLGAASGCVAGLVAITPASGFVSPLAIVIGLVAGVLCYLA VSVLTKLKGYYDDSLDAFGVHGLGGTGWAVATGLFA  
SKAVNSAGNDGLFYGNAQLVTQIETAVTWLFAGLATFHLKVVGLFCKLRVDADDEEAGLDITQHGEAYAAANVSSGTLFRDRTMA

>*Nitrospirae\_bacterium\_HCH-1\_Amt*

MRYIFTLFLMIATAYSDTPAGVDKGDATWILVSAAMVMFMTPALAMFYGGMVRRKNVLSIIMQSFAAIALVSLQWILFGYSLAFGPDFHGI  
IGGLDWAGLSSVTLEPNPDYAPTVPHMAFMFYQAMFAAITPALISGAFARMRFSAFIAFTFIWALVYVTPVAHWVWVWGGGWSMQMGLDF  
AGGIVVHVTSFGSALAAALYLKGRKGFPHDLMPHNLPLTVIGTGILWFGWFGFNAGSALSSGQLSTLAFVTSHTAAVSAVCVWITLWMLH  
GRPTMFGAATAIAGLATVTPAAGFITPMAALAIGCVAGVVCYFALNLKPRFGYDDSLDAFGVHGVGGGAGTICLGLFASKAINANGADGLFY  
GNAKQLIQLAAVLIVAVFSVMVTVIFKIIISLTSIRVNTETEVEGLDTPQHGESGYM

>*Bacillus\_cereus\_Amt*

MNTGDTVFMFVTTVMVMLMTPGLALFYGGMVRSKNVLSSTMHYSAMAIVSIQWIVIGYSLSFGPDWHGLIGTLDFWGLNGVTYAPNPDYS  
STIPHNLFMFMQMLFAILTPALISGAFARMRFSAFILFILLWTTIVNPVAHWVWVWGGWLRRELALDFAGGNVHVITSGVAGLVLAIFLKG  
RKNINGSSPHLLPFTMLGAGLLWFGWFGFNAGSALSLNDVLTAFINTNIAAASALTWMLSEWFFQSKPTAMGAACGVVSLVAITPACGF  
VTPFSALLIGAIGGVLCFAGVFFLTKFGYDDTLDAFGCHGIGGTWGGIATGLFATTTVNADGANGLFYGNAALLFKQLVAIGATYAFITLMT  
YAIKAINYFLPVRVDEHEEHMGLDISMHGEKAYEYTERVN

>*Homo\_sapiens\_Rh\_type\_B*

MNFTFATQKSLTLLPRLECNAGISAHCNLHLPGFQDVHAMVVFVGFGLMVFLQRYGFSSVGFTELLA AFALQWSTLVQGFHSHFGHHIVG  
VESMINADFCAGAVLISFGAVLKGKTGPTQLLLMALLEVVLFGINEFVLLHLLGVRDAGGSMITHFGAYFGLVLSRVLYRPQLEKSKHRQGSV  
YHSDLFAMIGTIFLWIFWPSFNAALTALGAGQHRTALNTYSLAASLTGTFALSALVGEDGRDLMVHIQNAALAGGVVVTSSSEMMLTPFGA  
LAAGFLAGTVSTLGYKFFTPILESFKFVQDTCGVHNLHGMPGVLGALLGVLAGLATHEAYGDGLESVFLIAEQRSATSQAMHQLFGLFV  
TLMFASVGGGLGGLLLKLPFLDSPDSQHYEDQVHWQVPEGEHDKAQRPLRVEEADTQA

>*Rattus\_norvegicus\_Rh\_type\_C*

MAWNTNLRGRLPITCLILQVMTMVVLFVGFVRYDIQADAHWWLEKRRKNISSDVENEFFYRYPSEFEDVHAMVVFVGFGLMITYLQRYGFSAVG  
FNLLAAAFGIQWALLMQGWFHFFEEGHILLSVENLIQADFCVASTCVAFGAVLKGKSPMQLLIMTFFQVTLFTVNEFILLNLEAKDAGGSMITH  
TFGAYFGLTVTWILYRKNLEQSKQRQSSVYHSDLFAMIGTIFLWIFWPSFNSASSFHGDTQHRAALNTYSLAASVLTVA VSSVIHKKGKLD  
MVHIQNTLAGGVGVGTAAEMMLTPY GALIVGFFCGILSTLGFAYLSPFLESRLRIQDTCGIHNLHGIPGIIGGIVGAVTAAVSSPDVYGEPIV  
HSFGFGGYKADWTKRMQGRSQIFGLLLSLAMALVGGIIVGFILKLPFVWGQASDENCFEDAIYWEVPEEVNTVYIPEDLAHKHSTSLVPAIPLV  
STPSASIVPPVPTPPASLATVTSSSLVH

>*Danio\_rerio\_Rh\_type\_B*

MAESTNLRRLPLICILEVILFVGLVEYNDDTDAKKWNKNSDTPATNEFYRYPSEFQDVHMVIFVGFGLMITYLQRYGFSMGMFNLI  
FSLQWATLMQGGFFHGMHGHKIHVGVTSMINADFCAGAVLISFGAVLKGKTSVQVLLVMAILEVTLFAVNEYILLSILGANDAGGSMITHFGAY  
FGLMVTRILHRPNLDKSKHKNSVYHSDLFAMIGTIFLWIFWPSFNSAITQYGDPOHRTAANTYSLAACTLATFGFSSLVNPEGKLDMVHIQ  
NAALAGGVAVGTAGEMMLTPFGSMIVGFLAGTISVLYKYLPFMESKLIQDTCGIHNLHGMPGILGAVGAVTAAASRDVYGNGLDKVF  
LEAADNSQWSAQTKGGFQAISLAVTLGIALIGLITGFLLLKLPYGPDPDTCFEDAVYWEVPEEEDHHELVSTQNEVEKLS

>*Kryptolebias\_marmoratus\_Rh\_type\_C*

MGNCCQYMGPOKNTYVRVSLPAVCFVWQIAMVILFVGFIRYDKESDTHWVEHKKHENLTDLDNDFYFRYPSEFQDVHMVIFVGFGLMITYL  
RYSYGGVGFNLIASFGLQWALLMQGWFHSPDPATGKIYIGVESLINADFCAGSLIAFGALLGKVPVQTMVVTFLGFTLFAVEEYIILDLH  
CRDAGGSMVHCFGGYYGLAISWMLYRPNLHQSKNLHGSYHSDLFAMIGTIFLWIFWPSFNSAITDHGDGQHRAAINTYIALASSVLTVA  
SSLAHKKGKLDMVHIQNTLAGGVAMGTAAEFMITYPYGALIVGFCMGIISTFGYLFITPFEKYLKLDQDTCGVHNLHVPGLGGFIGAIVAA  
AASTEVEYSEGLINTDFEGKYANRGVGTQGGYQAAGTCVSIAGLVGGALVGLILKFPWGDPAADDNCFDDEAYWELPEEEDILPPVLEYN  
NHMINKQDIAESNFTMEET

>*Takifugu\_rubripes\_Rh\_type\_A*

MPAYATNMRLKFPILALTELLTIVLFAVVFVYDDGKPSDDPHDPHAGNHTQEGAPMDLYPMFQDVHMVIFVGFGLMITYLQRYGFSV  
GVNLLLAAGLQWGLLMQGFWMEDGKIKINIFKINADSTATVLSFGAVLKGKTSVQVLLIMTILEITIFSIHELVATVIHANDVGA  
FGAYFGLAVARVLYRPLKNGHEKEGSVYHSDMFAMIGTIFLWIFWPSFNSAIAADPGFTQLTAVINTYLSAACVLSAYAVSSVVEHKGKLD  
DMVHIQNTLAGGVAVGTACDMNIGPFGAMLIGLVAGIISTLGFKFLTPILASSLGIQDTCGVHNLHGMPGILGGVAGIVAVAMGKKG  
SMQAAALASSLGFALVGLVGTGFIMKIPLWGQPPDQNCYDDSLYWEVPEEEDGESFAHADHSHKNAEV

>*Ralstonia\_pickettii\_12J\_Rh\_type*

MNSIKTGGDALFILLGAIMVLAMHAGFAFLELGTVRKKNQVNALVKILVDFVSTLAFYFFIGYTVAYGVNFFTGADVLAQQNGYELVKFFLL  
TFAAAIPAIISGGIAERSRFEPQLAATFVLVGFVYFFEGIAWNERFGIHWLQSVTGAEFHDFAGSVVHVAVGGWIALPAVLLLGARHG  
DGRIAAHPPSNIPFLAAGAVVLA VGFVGFVMSAQTLDKMSGLVAINSLMAMVGGTLTAWWGMKNDPGFSYNGPLAGLVA VCA  
HPLGALAVGGIAGVLFVVMFTRVQNVWRIDDVGVWPLHGLCGAWGGIAAGIFGLKALGGLGGVSVFVAQVAGTAGGIVIALVGGTVVYGT  
LRKLVGLRLDREAFAFMGADLAIHRVSSSTPESETHW

>*Burkholderia\_ambifaria\_IOP40-10\_Rh\_type*

MDGLKSGVDTLFLLAGAVMLAMHAGFAFLELGTVRKKNQVNALVKILVDFVSTLAFYFFIGYTVAYGVNFFTGADVLAQQNGYELVKFFLL  
TFAAAIPAIISGGIAERAKFNPQLVATLIIVGFYFFEGIAWNERDFGVQDWLTHAFGAPFHDFAGSVVHVAVGGWIALPAVLLLGARHG  
KDGRIAAHPPSNIPFLALGAVVLA VGFVGFVMSAQTLDKISGLVAVNSLMAMVGGTLAAWMAGRNDPGFTYNGPLAGLVA VCA  
HPIGALVTGAAAGAVFVAMFTCVQNKWRIDDVGVWPLHGMCGALGGLAAGVFGQPVFGGLGGVSVFVSLIGTLGGIAIATAGGTLVY  
KATVGLRLDREAFAFDGADLSIHRISATPERD

>*Pseudomonas\_putida\_HB3267\_Rh\_type*

MENMHSAMDLSLVHGSNTLFLMGAIVLAMHAGFAFLELGTVRHKNQVNALSKILSDFAISALVYFFIGYTVAYGVNFFTGADVLAQQNGYELVKFFLL  
LYKCFLLTFAAAIPAIISGGIAERARFVQLCATALIVAFYFFEGVWVWNGLVQAWLQARFGAPFHDFAGSVVHVAVGGWIALPAVLLLGARHG  
GARRGRYRDGRVAFAPSPFLALGSWILIGWFGFNMSAQTLDQVSGLVAINSLMAMVGGTSLALLAGRNDPGFLHNGPLAGLVA VCA

SDLMHPGALATGLVAGALFVWTFATAQNRWKIDDVLGVWPLHGLCGVWGGMACGIFGQEVGGMGGVSLVSQLGSLMGVVVALAGGF  
AVYGAIRALHGLRLSHEQEFQADLSLHRIGATSQD
